# Supplementary material
Source: PubMed Central journal article supplement (PMC5765380)

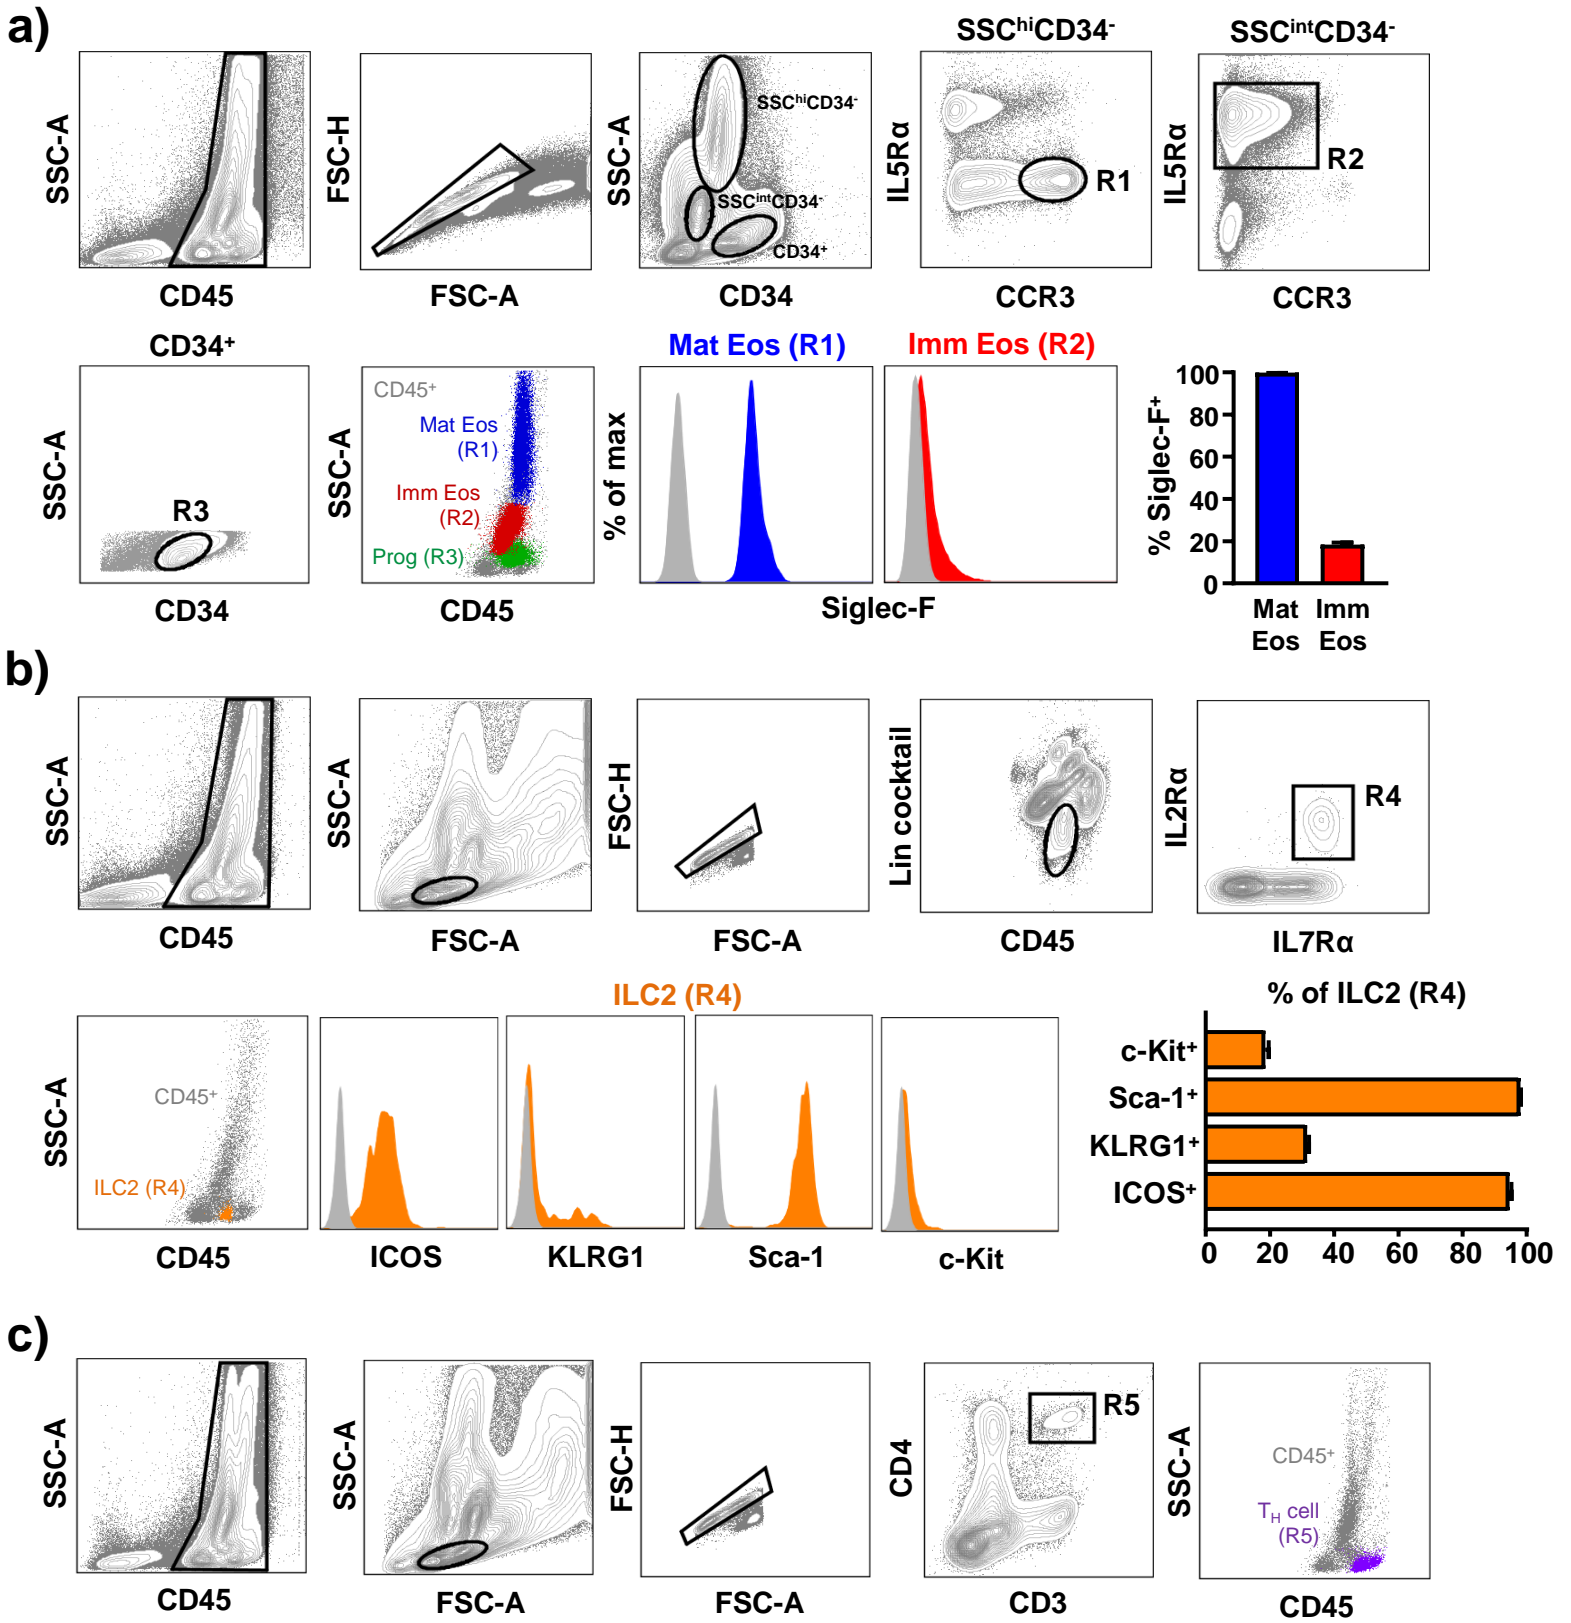

Figure S2

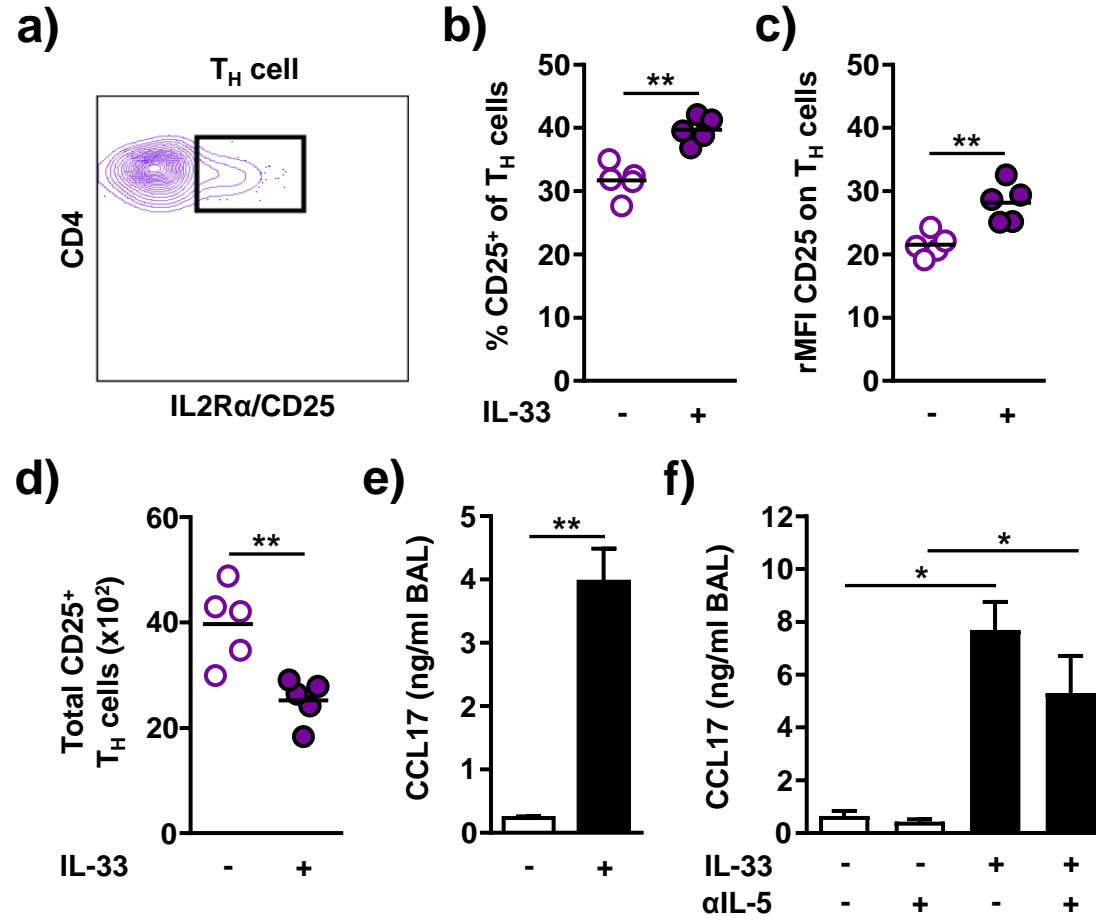

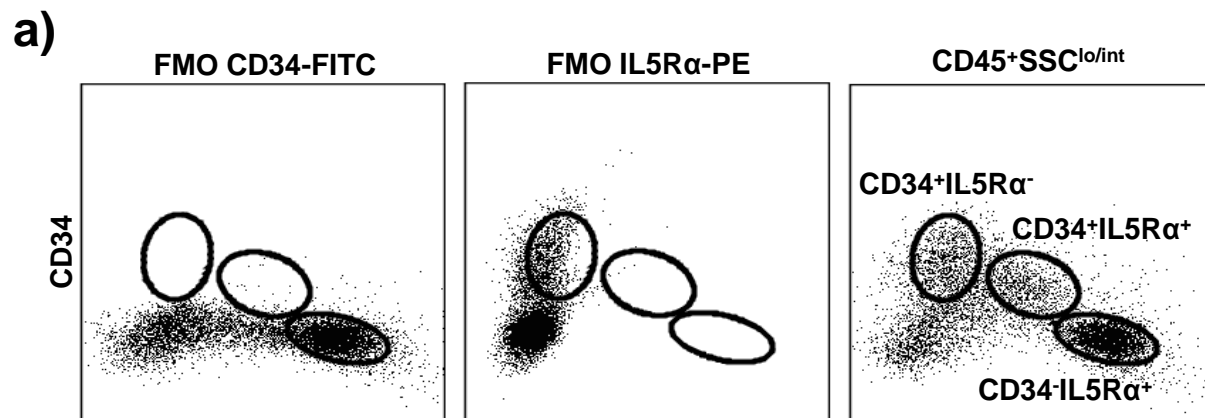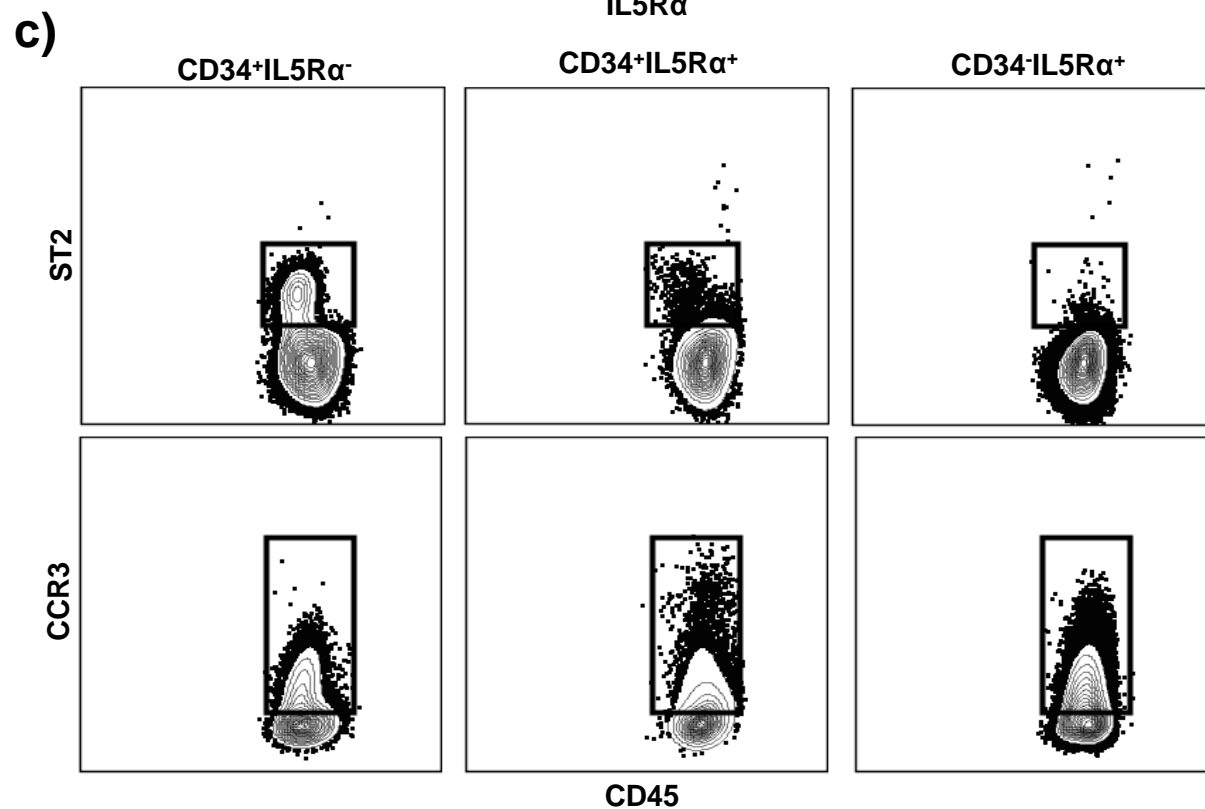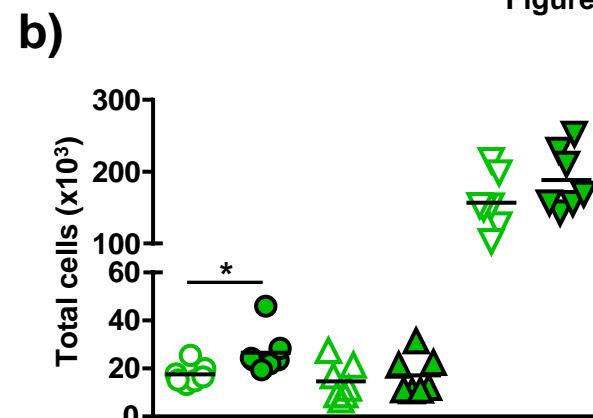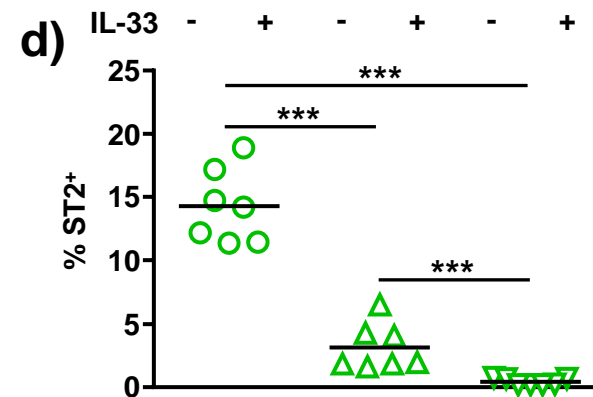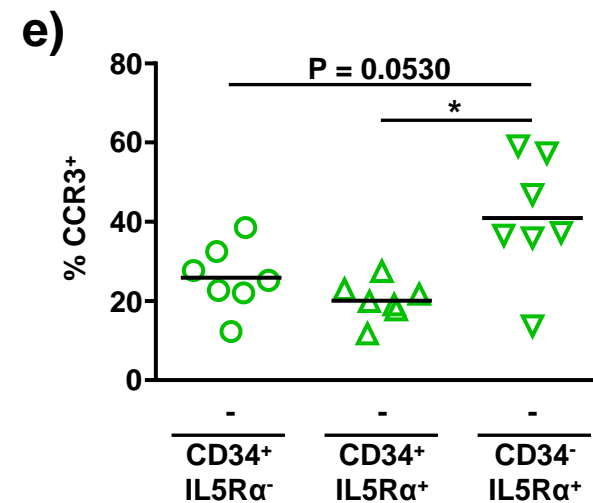

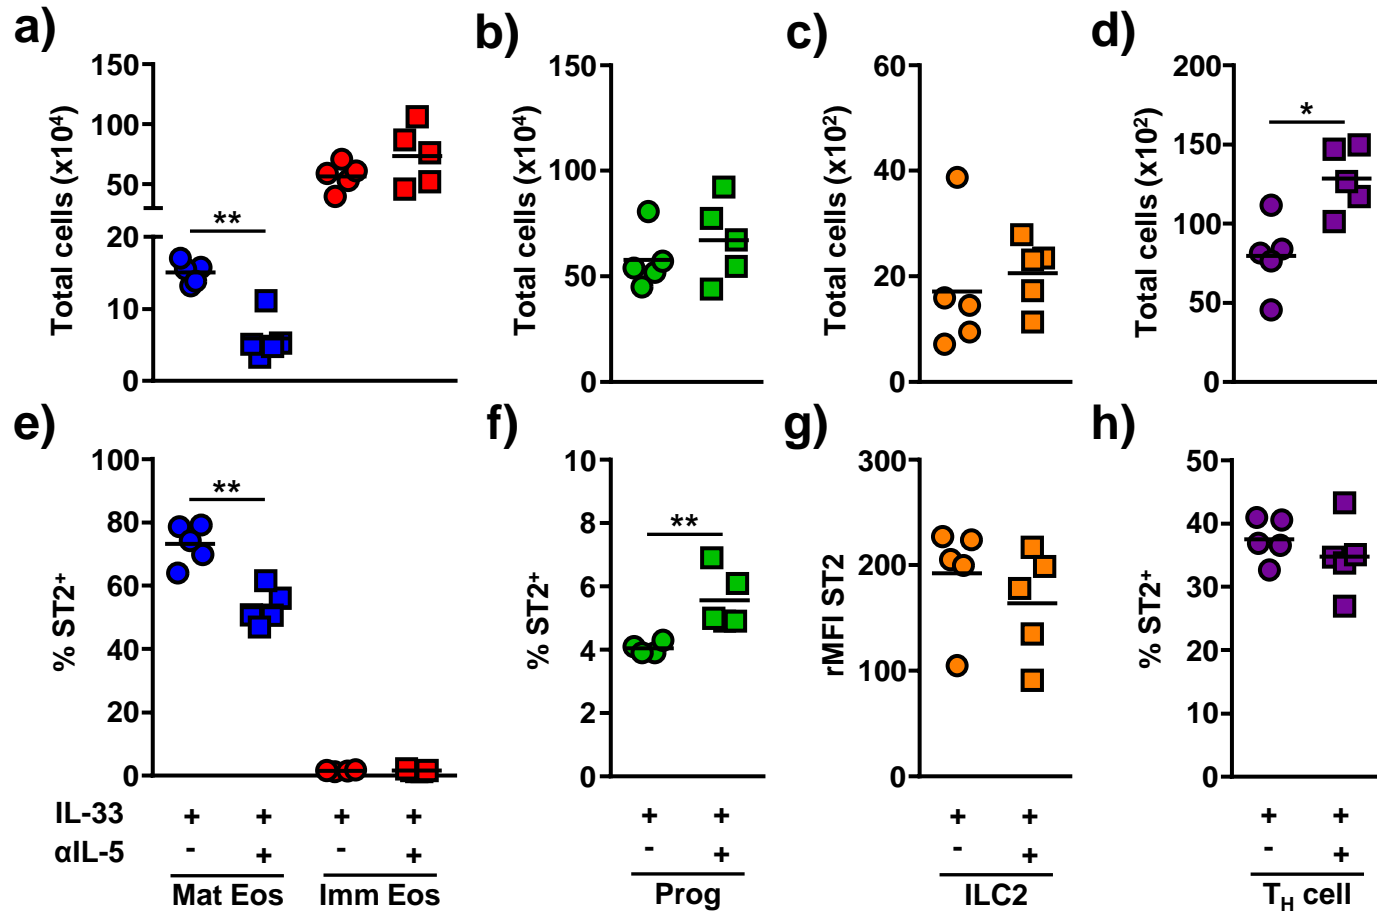

Supplement: IMM-153-268-s001.pdf [file IMM-153-268-s001.pdf]
